# Supplementary material for: Cohort profile: demographic and clinical characteristics of the MILESTONE longitudinal cohort of young people approaching the upper age limit of their child mental health care service in Europe
Source: PubMed Central journal article supplement — BMJ Open. 2021 Dec 16;11(12):e053373. doi: 10.1136/bmjopen-2021-053373 (PMC8679118; doi:10.1136/bmjopen-2021-053373), 2021-12-16
Supplement: bmjopen-2021-053373supp001.pdf [file bmjopen-2021-053373supp001.pdf]

## Supplementary material

Supplementary Table 1: Recruitment by country

|                                              | Total |       | Belgium |       | Croatia |       | France |       | Germany |       | Ireland |       | Italy |       | Netherlands |       | UK   |       |
|----------------------------------------------|-------|-------|---------|-------|---------|-------|--------|-------|---------|-------|---------|-------|-------|-------|-------------|-------|------|-------|
|                                              | Exc.  | Inc.  | Exc.    | Inc.  | Exc.    | Inc.  | Exc.   | Inc.  | Exc.    | Inc.  | Exc.    | Inc.  | Exc.  | Inc.  | Exc.        | Inc.  | Exc. | Inc.  |
| Assessed for eligibility                     |       | 6238  |         | 471   |         | 274   |        | 229   |         | 600   |         | 357   |       | 998   |             | 1180  |      | 2129  |
| Ineligible                                   | 2941  |       | 285     |       | 138     |       | 1      |       | 327     |       | 51      |       | 386   |       | 578         |       | 1175 |       |
| Eligible                                     |       | 3297  |         | 186   |         | 136   |        | 228   |         | 273   |         | 306   |       | 612   |             | 602   |      | 954   |
| Total not recruited <sup>1</sup>             | 2511  |       | 122     |       | 84      |       | 143    |       | 209     |       | 260     |       | 442   |       | 481         |       | 770  |       |
| <i>Study was not introduced</i> <sup>2</sup> | 568   |       | 5       |       | 0       |       | 1      |       | 2       |       | 39      |       | 293   |       | 33          |       | 195  |       |
| <i>Study introduced</i>                      | 906   |       | 51      |       | 25      |       | 118    |       | 81      |       | 174     |       | 52    |       | 252         |       | 153  |       |
| <i>No evidence study introduced</i>          | 1037  |       | 66      |       | 59      |       | 24     |       | 126     |       | 47      |       | 97    |       | 196         |       | 422  |       |
| Recruited                                    |       | 786   |         | 64    |         | 52    |        | 85    |         | 64    |         | 46    |       | 170   |             | 121   |      | 184   |
| Withdrew before T1                           | 23    |       | 0       |       | 0       |       | 0      |       | 0       |       | 2       |       | 3     |       | 11          |       | 7    |       |
| Participated in baseline assessment          |       | 763   |         | 64    |         | 52    |        | 85    |         | 64    |         | 44    |       | 167   |             | 110   |      | 177   |
| Response rate <sup>3</sup>                   |       | 45.7% |         | 55.7% |         | 67.5% |        | 41.9% |         | 44.1% |         | 20.2% |       | 76.3% |             | 30.4% |      | 53.6% |

Note. Inc. = included; Exc. = excluded. <sup>1</sup> = total of 'study was not introduced', 'study introduced' and 'no evidence study introduced'. <sup>2</sup> young people were too unwell or unable to consent or assent. <sup>3</sup> = Recruited/(Introduced+Recruited)

Supplementary Table 2 – Missing data on measures of problem levels and severity of psychopathology

|                                                | Informant                                           |             |            |                                                        |            |            |                                                     |            |            |
|------------------------------------------------|-----------------------------------------------------|-------------|------------|--------------------------------------------------------|------------|------------|-----------------------------------------------------|------------|------------|
|                                                | Self-reported emotional/behavioral problems (Y/ASR) |             |            | Parent-reported emotional/behavioral problems (C/ABCL) |            |            | Clinician rated severity of psychopathology (C-GIS) |            |            |
|                                                | Not missing                                         | Missing     | Total      | Not missing                                            | Missing    | Total      | Not missing                                         | Missing    | Total      |
| Self-reported emotional/ behavioral problems   |                                                     |             |            | $\chi^2 (1, n = 683) = 12.351, p < 0.001$              |            |            | $\chi^2 (1, n = 683) = 0.000, p = 1$                |            |            |
| normal                                         |                                                     |             |            | 298 (85.6%)                                            | 50 (14.4%) | 348 (100%) | 301 (86.5%)                                         | 47 (13.5%) | 348 (100%) |
| borderline clinical/clinical                   |                                                     |             |            | 250 (74.6%)                                            | 85 (25.4%) | 335 (100%) | 290 (86.6%)                                         | 45 (13.4%) | 335 (100%) |
| Parent-reported emotional/ behavioral problems | $\chi^2 (1, n = 572) = 0.236, p = 0.627$            |             |            |                                                        |            |            | $\chi^2 (1, n = 572) = 0.541, p = 0.462$            |            |            |
| normal                                         | 9 (3.5%)                                            | 245 (96.5%) | 254 (100%) |                                                        |            |            | 225 (88.6%)                                         | 29 (11.4%) | 254 (100%) |
| borderline clinical/clinical                   | 15 (4.7%)                                           | 303 (95.3%) | 318 (100%) |                                                        |            |            | 274 (86.2%)                                         | 44 (13.8%) | 318 (100%) |
| Clinician rated severity of psychopathology    | $\chi^2 (2, n = 640) = 5.158, p = 0.076$            |             |            | $\chi^2 (2, n = 640) = 12.08, p = 0.002$               |            |            |                                                     |            |            |
| not at all ill                                 | 55 (91.7%)                                          | 5 (8.3%)    | 60 (100%)  | 44 (73.3%)                                             | 16 (26.7%) | 60 (100%)  |                                                     |            |            |
| borderline/mildly/moderately ill               | 411 (93.8%)                                         | 27 (6.2%)   | 438 (100%) | 358 (81.7%)                                            | 80 (18.3%) | 438 (100%) |                                                     |            |            |
| markedly ill or more severe                    | 125 (88.0%)                                         | 17 (12.0%)  | 142 (100%) | 97 (68.3%)                                             | 45 (31.7%) | 142 (100%) |                                                     |            |            |

Note. Pr. = problems. Patterns of missing data on severity of psychopathology (CGI-S) and problem levels (Y/ASR and C/ABCL) were assessed using Chi-square tests. All analyses were conducted in R with a significance level of  $\alpha=0.05$ .

**Supplementary Table 3: Parent/carer and clinician demographic characteristics**

| <i>Parent/carer characteristics (n = 651)</i>                        | N (%)       |
|----------------------------------------------------------------------|-------------|
| Relationship to the young person participating                       |             |
| biological parent                                                    | 585 (89.9%) |
| other (adoptive or foster parent, grandparent, stepparent, or other) | 21 (3.2%)   |
| missing                                                              | 45 (6.9%)   |
| Highest completed level of education of PCs <sup>1</sup>             |             |
| primary                                                              | 37 (5.7%)   |
| secondary/vocational                                                 | 331 (50.8%) |
| higher (under/postgraduate)                                          | 201 (30.9%) |
| missing                                                              | 82 (12.6%)  |
| Psychopathology in biological parents                                |             |
| No psychopathology                                                   | 351 (53.9%) |
| Psychopathology in one or both biological parents                    | 194 (29.8%) |
| missing                                                              | 106 (16.3%) |
| <i>Clinician characteristics (n = 318)</i>                           |             |
| Profession                                                           |             |
| psychiatrist                                                         | 116 (36.5%) |
| psychologist                                                         | 64 (20.1%)  |
| nurse                                                                | 33 (10.4%)  |
| psychotherapist                                                      | 33 (10.4%)  |
| other (e.g. family and occupational therapists, support workers)     | 29 (9.2%)   |
| missing                                                              | 43 (13.5%)  |
| Years of experience working in mental health                         |             |
| 5 years or less                                                      | 47 (14.8%)  |
| 6 to 10 years                                                        | 58 (18.2%)  |
| 11 to 20 years                                                       | 113 (35.6%) |
| more than 20 years                                                   | 57 (17.9%)  |
| missing                                                              | 43 (13.5%)  |

Note: percentages for parent/carers are based on the total number of parents/carers participating (n = 651). Percentages for clinicians are based on the total number of clinicians participating (n = 318); <sup>1</sup> as a surrogate for socioeconomic status

Supplementary Figure 1 – Mean HoNOSCA score by domain

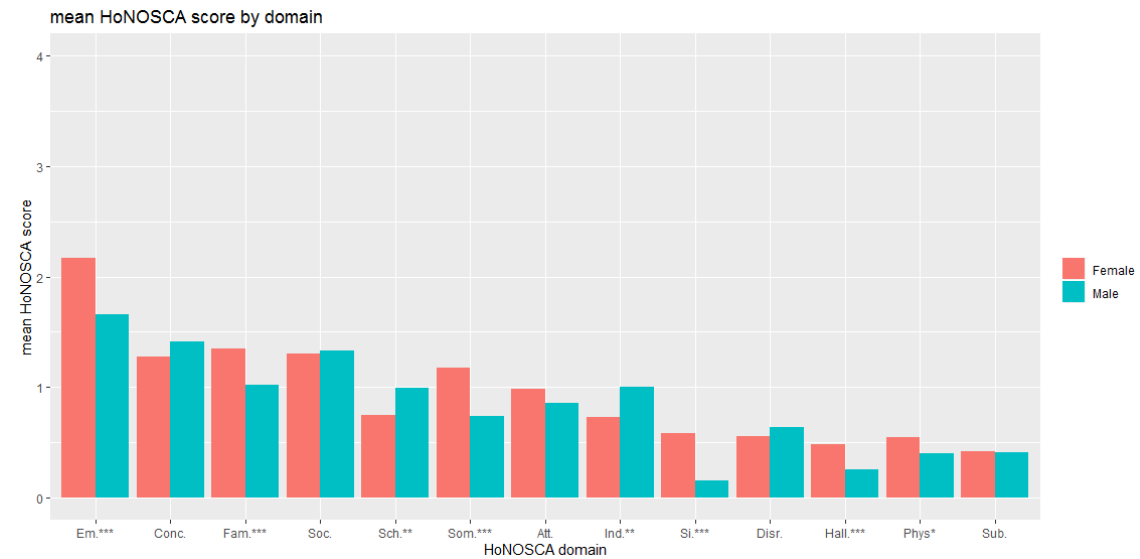

Note: \*, \*\* and \*\*\* indicate gender differences on a  $p < 0.05$ ,  $p < 0.01$  or  $p < 0.001$  level; gender differences were assessed with a Kruskal-Wallis rank sum test; Em. = emotional and related symptoms, Conc. = overactivity attention and concentration, Fam. = family life and relationships, Soc. = peer relationships, Sch. = scholastic or language skills, Som. = non-organic somatic symptoms, Att. = poor school attendance, Ind. = self-care and independence, Si. = non-accidental self-injury, Disr. = disruptive antisocial or aggressive behaviour, Hall. = hallucinations and delusions, Phys. = physical illness or disability problems, Sub. = alcohol, substance/solvent misuse
